# Supplementary material for: Estimates of Genetic Parameters for Shape Space Data in Franches-Montagnes Horses
Source: MDPI journal article supplement (doi:10.3390/ani12172186), 2022-08-25
Supplement: s1 [file s1]

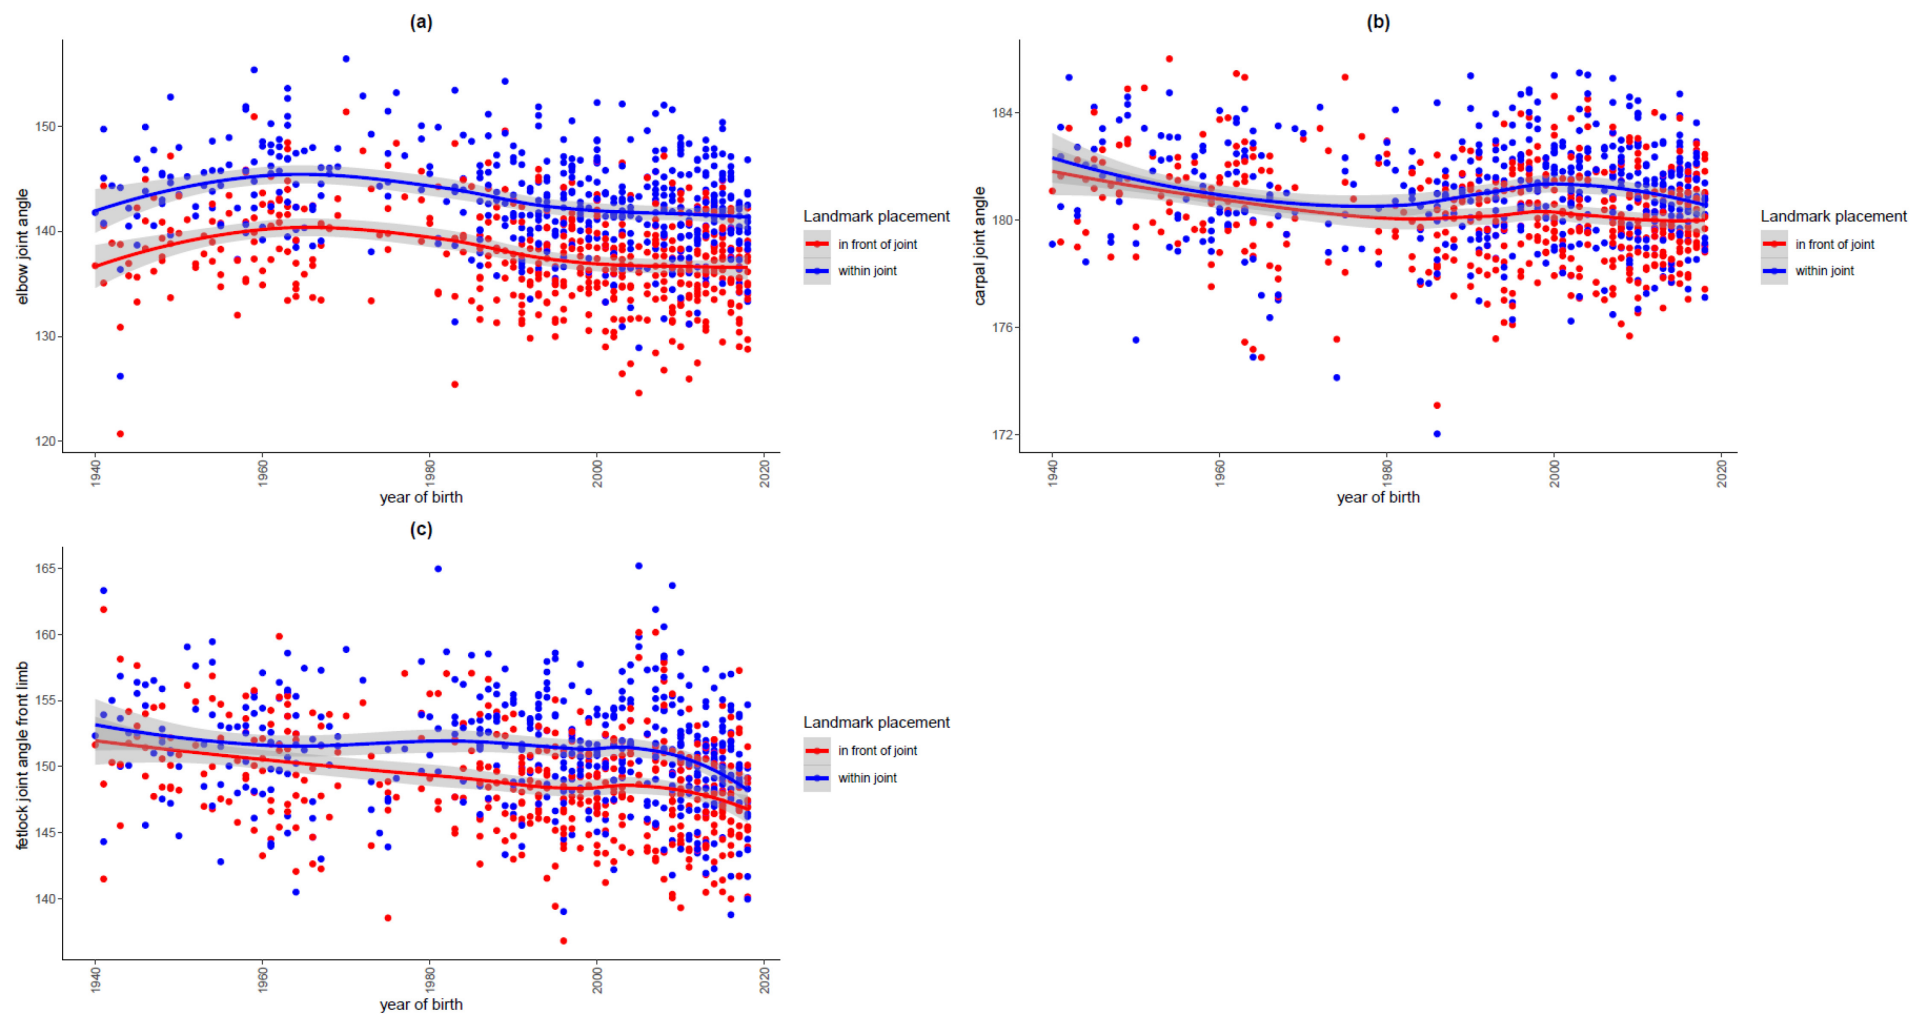

*Figure S3: Evolution of front limb joint angle measurements of the elbow joint angle (a), carpal joint angle (b) and fetlock joint angle (c) in Franches-Montagnes stallions born between 1940 and 2018, with the trend line (in blue, with the confidence interval in light grey) from local polynomial regression fitting.*
