# Supplementary material for: Estimates of Genetic Parameters for Shape Space Data in Franches-Montagnes Horses
Source: MDPI journal article supplement (doi:10.3390/ani12172186), 2022-08-25
Supplement: s1 [file s1]

## File S1

### S1.1 Poll angle

#### Summary of fixed effects estimates

|             | Estimate | Std. Error | t value | Pr(> t ) |
|-------------|----------|------------|---------|----------|
| (Intercept) | 241.1716 | 30.63599   | 7.872   | 2.47E-14 |
| Age         | 0.18216  | 0.09813    | 1.856   | 0.0641   |
| Head_height | -0.37911 | 0.65022    | -0.583  | 0.5601   |
| Head_camera | 1.28345  | 0.27672    | 4.638   | 4.58E-06 |
| Front_limb  | 0.20937  | 0.25455    | 0.823   | 0.4112   |
| Hind_limb   | 0.30274  | 0.28573    | 1.06    | 0.2899   |
| Body        | -0.42556 | 0.4604     | -0.924  | 0.3558   |
| YOB         | -0.07067 | 0.01527    | -4.628  | 4.79E-06 |
| Sexg        | -1.02843 | 0.86335    | -1.191  | 0.2342   |
| Sexs        | -0.38423 | 0.7362     | -0.522  | 0.602    |

### S1.2 Neck-shoulderblade angle

#### Summary of fixed effects estimates

|             | Estimate | Std. Error | t value | Pr(> t ) |
|-------------|----------|------------|---------|----------|
| (Intercept) | -104.403 | 29.21216   | -3.574  | 0.000388 |
| Age         | -0.34653 | 0.09357    | -3.703  | 2.38E-04 |
| Head_height | -6.05358 | 0.62       | -9.764  | < 2e-16  |
| Head_camera | 0.06539  | 0.26386    | 0.248   | 0.804371 |
| Front_limb  | -0.86244 | 0.24271    | -3.553  | 4.19E-04 |
| Hind_limb   | 0.51545  | 0.27245    | 1.892   | 0.059123 |
| Body        | 1.92678  | 0.439      | 4.389   | 1.41E-05 |
| YOB         | 0.09721  | 0.01456    | 6.677   | 6.97E-11 |
| Sexg        | 0.37447  | 0.82322    | 0.455   | 6.49E-01 |
| Sexs        | 0.87578  | 0.70199    | 1.248   | 0.212814 |

### S1.3 Shoulder joint angle

#### Summary of fixed effects estimates

|             | Estimate | Std. Error | t value | Pr(> t ) |
|-------------|----------|------------|---------|----------|
| (Intercept) | -24.4183 | 24.25151   | -1.007  | 0.314516 |
| Age         | -0.18607 | 0.07768    | -2.395  | 1.70E-02 |
| Head_height | -0.27377 | 0.51471    | -0.532  | 0.595053 |
| Head_camera | -0.23079 | 0.21905    | -1.054  | 0.292618 |
| Front_limb  | 0.6879   | 0.2015     | 3.414   | 6.96E-04 |
| Hind_limb   | 0.17918  | 0.22618    | 0.792   | 0.428659 |
| Body        | 0.35724  | 0.36445    | 0.98    | 3.27E-01 |
| YOB         | 0.06454  | 0.01209    | 5.34    | 1.46E-07 |
| Sexg        | -0.91933 | 0.68343    | -1.345  | 1.79E-01 |
| Sexs        | -2.5334  | 0.58278    | -4.347  | 1.70E-05 |

## S1.4 Elbow joint angle

### Summary of fixed effects estimates

|             | Estimate | Std. Error | t value | Pr(> t ) |
|-------------|----------|------------|---------|----------|
| (Intercept) | 265.5907 | 25.14332   | 10.563  | < 2e-16  |
| Age         | -0.26062 | 0.08054    | -3.236  | 1.30E-03 |
| Head_height | -2.59472 | 0.53364    | -4.862  | 1.59E-06 |
| Head_camera | -0.01383 | 0.22711    | -0.061  | 0.9515   |
| Front_limb  | -1.28772 | 0.20891    | -6.164  | 1.54E-09 |
| Hind_limb   | -0.29809 | 0.2345     | -1.271  | 0.2043   |
| Body        | -0.8344  | 0.37786    | -2.208  | 2.77E-02 |
| YOB         | -0.0559  | 0.01253    | -4.461  | 1.03E-05 |
| Sexg        | -1.02187 | 0.70856    | -1.442  | 1.50E-01 |
| Sexs        | -4.15617 | 0.60421    | -6.879  | 1.96E-11 |

## S1.5 Elbow joint angle (landmarks inside joints)

### Summary of fixed effects estimates

|             | Estimate | Std. Error | t value | Pr(> t ) |
|-------------|----------|------------|---------|----------|
| (Intercept) | 277.138  | 25.82302   | 10.732  | < 2e-16  |
| Age         | -0.25732 | 0.08272    | -3.111  | 1.98E-03 |
| Head_height | -2.59673 | 0.54807    | -4.738  | 2.87E-06 |
| Head_camera | -0.02301 | 0.23324    | -0.099  | 0.92146  |
| Front_limb  | -1.29993 | 0.21456    | -6.059  | 2.84E-09 |
| Hind_limb   | -0.29462 | 0.24084    | -1.223  | 0.22183  |
| Body        | -0.88661 | 0.38807    | -2.285  | 2.28E-02 |
| YOB         | -0.05889 | 0.01287    | -4.576  | 6.10E-06 |
| Sexg        | -1.05947 | 0.72771    | -1.456  | 1.46E-01 |
| Sexs        | -4.52817 | 0.62054    | -7.297  | 1.28E-12 |

## S1.6 Carpal joint angle

### Summary of fixed effects estimates

|             | Estimate | Std. Error | t value | Pr(> t ) |
|-------------|----------|------------|---------|----------|
| (Intercept) | 233.4741 | 11.58862   | 20.147  | < 2e-16  |
| Age         | -0.11667 | 0.037121   | -3.143  | 1.78E-03 |
| Head_height | 0.301424 | 0.245957   | 1.226   | 2.21E-01 |
| Head_camera | -0.17158 | 0.104673   | -1.639  | 0.101859 |
| Front_limb  | 0.013811 | 0.096286   | 0.143   | 8.86E-01 |
| Hind_limb   | -0.12048 | 0.108081   | -1.115  | 0.265539 |
| Body        | -0.57808 | 0.174155   | -3.319  | 9.73E-04 |
| YOB         | -0.0245  | 0.005776   | -4.241  | 2.68E-05 |
| Sexg        | -0.59228 | 0.326577   | -1.814  | 7.04E-02 |
| Sexs        | -1.87859 | 0.278482   | -6.746  | 4.53E-11 |

### S1.7 Carpal joint angle (landmarks inside joints)

#### Summary of fixed effects estimates

|             | Estimate | Std. Error | t value | Pr(> t ) |
|-------------|----------|------------|---------|----------|
| (Intercept) | 203.6879 | 12.27178   | 16.598  | < 2e-16  |
| Age         | -0.11065 | 0.039309   | -2.815  | 5.09E-03 |
| Head_height | 0.131138 | 0.260456   | 0.503   | 6.15E-01 |
| Head_camera | -0.09869 | 0.110844   | -0.89   | 0.373736 |
| Front_limb  | -0.03413 | 0.101962   | -0.335  | 7.38E-01 |
| Hind_limb   | -0.07344 | 0.114452   | -0.642  | 0.521435 |
| Body        | -0.69805 | 0.184422   | -3.785  | 1.74E-04 |
| Sexg        | -0.87398 | 0.345829   | -2.527  | 1.18E-02 |
| Sexs        | -2.00539 | 0.294899   | -6.8    | 3.22E-11 |
| YOB         | -0.00891 | 0.006116   | -1.456  | 1.46E-01 |

### S1.8 Fetlock joint of the forelimb

#### Summary of fixed effects estimates

|             | Estimate | Std. Error | t value | Pr(> t ) |
|-------------|----------|------------|---------|----------|
| (Intercept) | 241.1793 | 24.84248   | 9.708   | < 2e-16  |
| Age         | 0.100857 | 0.079576   | 1.267   | 2.06E-01 |
| Head_height | -0.00121 | 0.527257   | -0.002  | 9.98E-01 |
| Head_camera | -0.05605 | 0.224388   | -0.25   | 0.802857 |
| Front_limb  | 0.28871  | 0.206408   | 1.399   | 1.63E-01 |
| Hind_limb   | 0.640551 | 0.231693   | 2.765   | 0.005925 |
| Body        | -0.52407 | 0.373336   | -1.404  | 1.61E-01 |
| YOB         | -0.04586 | 0.012381   | -3.704  | 2.38E-04 |
| Sexg        | -0.9126  | 0.700082   | -1.304  | 1.93E-01 |
| Sexs        | -1.83367 | 0.59698    | -3.072  | 2.25E-03 |

### S1.9 Fetlock joint of the forelimb (landmarks inside joints)

#### Summary of fixed effects estimates

|             | Estimate | Std. Error | t value | Pr(> t ) |
|-------------|----------|------------|---------|----------|
| (Intercept) | 196.4598 | 26.84227   | 7.319   | 1.11E-12 |
| Age         | 0.211335 | 0.085982   | 2.458   | 1.43E-02 |
| Head_height | 0.406778 | 0.5697     | 0.714   | 4.76E-01 |
| Head_camera | 0.009479 | 0.242451   | 0.039   | 0.96883  |
| Front_limb  | -0.04512 | 0.223024   | -0.202  | 8.40E-01 |
| Hind_limb   | 0.670365 | 0.250344   | 2.678   | 0.00767  |
| Body        | -0.30454 | 0.403389   | -0.755  | 4.51E-01 |
| YOB         | -0.02345 | 0.013378   | -1.753  | 8.03E-02 |
| Sexg        | -0.81302 | 0.756437   | -1.075  | 2.83E-01 |
| Sexs        | -1.05442 | 0.645037   | -1.635  | 1.03E-01 |

### S1.10 Hip joint angle

#### Summary of fixed effects estimates

|             | Estimate | Std. Error | t value | Pr(> t ) |
|-------------|----------|------------|---------|----------|
| (Intercept) | 154.7431 | 16.88321   | 9.166   | < 2e-16  |
| Age         | -0.01757 | 0.054081   | -0.325  | 7.46E-01 |
| Head_height | 0.489853 | 0.358329   | 1.367   | 1.72E-01 |
| Head_camera | 0.089267 | 0.152496   | 0.585   | 0.5586   |
| Front_limb  | 0.128539 | 0.140277   | 0.916   | 3.60E-01 |
| Hind_limb   | -1.44735 | 0.157461   | -9.192  | < 2e-16  |
| Body        | 1.343888 | 0.253723   | 5.297   | 1.82E-07 |
| YOB         | -0.0381  | 0.008415   | -4.528  | 7.57E-06 |
| Sexg        | -0.84816 | 0.475783   | -1.783  | 7.53E-02 |
| Sexs        | -2.55807 | 0.405714   | -6.305  | 6.70E-10 |

### S1.11 Hip joint angle (landmarks within joints)

#### Summary of fixed effects estimates

|             | Estimate | Std. Error | t value | Pr(> t ) |
|-------------|----------|------------|---------|----------|
| (Intercept) | 193.2437 | 18.41669   | 10.493  | < 2e-16  |
| Age         | -0.09364 | 0.058993   | -1.587  | 1.13E-01 |
| Head_height | 0.076766 | 0.390876   | 0.196   | 8.44E-01 |
| Head_camera | 0.258056 | 0.166348   | 1.551   | 0.122    |
| Front_limb  | -0.04755 | 0.153019   | -0.311  | 7.56E-01 |
| Hind_limb   | -1.8865  | 0.171763   | -10.983 | < 2e-16  |
| Body        | 1.65951  | 0.276768   | 5.996   | 4.06E-09 |
| YOB         | -0.04338 | 0.009179   | -4.726  | 3.03E-06 |
| Sexg        | -0.43844 | 0.518998   | -0.845  | 3.99E-01 |
| Sexs        | -1.79505 | 0.442565   | -4.056  | 5.85E-05 |

### S1.12 Stifle joint angle

#### Summary of fixed effects estimates

|             | Estimate | Std. Error | t value | Pr(> t ) |
|-------------|----------|------------|---------|----------|
| (Intercept) | 43.49743 | 20.35857   | 2.137   | 3.32E-02 |
| Age         | 0.20593  | 0.06521    | 3.158   | 1.69E-03 |
| Head_height | 0.25756  | 0.43209    | 0.596   | 5.51E-01 |
| Head_camera | 0.3376   | 0.18389    | 1.836   | 0.067007 |
| Front_limb  | 0.61739  | 0.16915    | 3.65    | 2.92E-04 |
| Hind_limb   | 1.64405  | 0.18987    | 8.659   | < 2e-16  |
| Body        | 1.93929  | 0.30595    | 6.339   | 5.49E-10 |
| YOB         | 0.02268  | 0.01015    | 2.235   | 2.59E-02 |
| Sexg        | -1.32872 | 0.57372    | -2.316  | 2.10E-02 |
| Sexs        | -2.43209 | 0.48923    | -4.971  | 9.37E-07 |

### S1.13 Stifle joint angle (landmarks within joints)

#### Summary of fixed effects estimates

|             | Estimate | Std. Error | t value | Pr(> t ) |
|-------------|----------|------------|---------|----------|
| (Intercept) | 114.3025 | 20.92364   | 5.463   | 7.65E-08 |
| Age         | 0.151208 | 0.067023   | 2.256   | 2.45E-02 |
| Head_height | -0.2341  | 0.444083   | -0.527  | 5.98E-01 |
| Head_camera | 0.529435 | 0.188991   | 2.801   | 0.0053   |
| Front_limb  | 0.46754  | 0.173848   | 2.689   | 7.42E-03 |
| Hind_limb   | 1.002167 | 0.195144   | 5.136   | 4.15E-07 |
| Body        | 2.539423 | 0.314443   | 8.076   | 5.80E-15 |
| YOB         | 0.004615 | 0.010428   | 0.443   | 6.58E-01 |
| Sexg        | -1.1327  | 0.589645   | -1.921  | 5.54E-02 |
| Sexs        | -1.62482 | 0.502808   | -3.231  | 1.32E-03 |

### S1.14 Hock joint angle

#### Summary of fixed effects estimates

|             | Estimate | Std. Error | t value | Pr(> t ) |
|-------------|----------|------------|---------|----------|
| (Intercept) | 132.7695 | 13.6633    | 9.717   | < 2e-16  |
| Age         | 0.034637 | 0.043767   | 0.791   | 4.29E-01 |
| Head_height | 0.291889 | 0.28999    | 1.007   | 3.15E-01 |
| Head_camera | 0.091043 | 0.123413   | 0.738   | 0.4611   |
| Front_limb  | 0.253039 | 0.113524   | 2.229   | 2.63E-02 |
| Hind_limb   | -0.90213 | 0.12743    | -7.079  | 5.37E-12 |
| Body        | 0.463002 | 0.205334   | 2.255   | 2.46E-02 |
| YOB         | 0.009919 | 0.00681    | 1.457   | 1.46E-01 |
| Sexg        | -0.4354  | 0.385043   | -1.131  | 2.59E-01 |
| Sexs        | -0.44425 | 0.328338   | -1.353  | 1.77E-01 |

### S1.15 Hock joint angle (landmarks within joints)

#### Summary of fixed effects estimates

|             | Estimate | Std. Error t | value  | Pr(> t ) |
|-------------|----------|--------------|--------|----------|
| (Intercept) | 200.7653 | 15.93362     | 12.6   | < 2e-16  |
| Age         | 0.045903 | 0.051039     | 0.899  | 3.69E-01 |
| Head_height | 0.178609 | 0.338175     | 0.528  | 5.98E-01 |
| Head_camera | 0.086489 | 0.143919     | 0.601  | 0.548163 |
| Front_limb  | 0.415378 | 0.132388     | 3.138  | 1.81E-03 |
| Hind_limb   | -1.11215 | 0.148604     | -7.484 | 3.64E-13 |
| Body        | 0.742079 | 0.239452     | 3.099  | 2.06E-03 |
| YOB         | -0.01981 | 0.007941     | -2.495 | 1.29E-02 |
| Sexg        | -1.16335 | 0.449023     | -2.591 | 9.88E-03 |
| Sexs        | -1.2705  | 0.382895     | -3.318 | 9.77E-04 |

### S1.16 Fetlock joint of the hind limb

#### Summary of fixed effects estimates

|             | Estimate | Std. Error | t value | Pr(> t ) |
|-------------|----------|------------|---------|----------|
| (Intercept) | 242.1572 | 28.71987   | 8.432   | 4.32E-16 |
| Age         | -0.06403 | 0.092      | -0.696  | 4.87E-01 |
| Head_height | -0.88031 | 0.60955    | -1.444  | 1.49E-01 |
| Head_camera | -0.40909 | 0.25941    | -1.577  | 0.11548  |
| Front_limb  | -0.74789 | 0.23862    | -3.134  | 1.83E-03 |
| Hind_limb   | -0.41299 | 0.26785    | -1.542  | 1.24E-01 |
| Body        | 0.21828  | 0.43161    | 0.506   | 6.13E-01 |
| YOB         | -0.04036 | 0.01431    | -2.82   | 5.01E-03 |
| Sexg        | -0.45086 | 0.80935    | -0.557  | 5.78E-01 |
| Sexs        | 1.0869   | 0.69016    | 1.575   | 1.16E-01 |

### S1.17 Fetlock joint of the hind limb (landmarks inside joints)

#### Summary of fixed effects estimates

|             | Estimate | Std. Error | t value | Pr(> t ) |
|-------------|----------|------------|---------|----------|
| (Intercept) | 184.4095 | 28.99549   | 6.36    | 4.83E-10 |
| Age         | 0.07006  | 0.09288    | 0.754   | 4.51E-01 |
| Head_height | -0.49799 | 0.6154     | -0.809  | 4.19E-01 |
| Head_camera | -0.59697 | 0.2619     | -2.279  | 0.0231   |
| Front_limb  | -0.76751 | 0.24091    | -3.186  | 1.54E-03 |
| Hind_limb   | -0.21095 | 0.27043    | -0.78   | 4.36E-01 |
| Body        | 0.96495  | 0.43575    | 2.214   | 2.73E-02 |
| YOB         | -0.0116  | 0.01445    | -0.803  | 4.23E-01 |
| Sexg        | 0.24532  | 0.81712    | 0.3     | 7.64E-01 |
| Sexs        | 1.19121  | 0.69678    | 1.71    | 8.80E-02 |

### S1.18 PC1

#### Summary of fixed effects estimates

|             | Estimate  | Std. Error | t value | Pr(> t ) |
|-------------|-----------|------------|---------|----------|
| (Intercept) | 3.83E-01  | 1.20E-01   | 3.189   | 0.001524 |
| Age         | -1.19E-03 | 3.85E-04   | -3.082  | 0.002176 |
| Head_height | -4.00E-02 | 2.55E-03   | -15.684 | < 2e-16  |
| Head_camera | 2.64E-03  | 1.09E-03   | 2.429   | 0.015518 |
| Front_limb  | -2.30E-03 | 9.98E-04   | -2.299  | 0.021924 |
| Hind_limb   | -2.51E-03 | 1.12E-03   | -2.238  | 0.025673 |
| Body        | 4.13E-03  | 1.81E-03   | 2.289   | 0.022544 |
| YOB         | -1.62E-04 | 5.99E-05   | -2.704  | 0.007099 |
| Sexg        | 1.23E-03  | 3.39E-03   | 0.364   | 0.715803 |
| Sexs        | 1.07E-02  | 2.89E-03   | 3.708   | 0.000234 |

### S1.19 PC2

#### Summary of fixed effects estimates

|             | Estimate  | Std. Error | t value | Pr(> t ) |
|-------------|-----------|------------|---------|----------|
| (Intercept) | -7.40E-02 | 9.75E-02   | -0.759  | 0.448337 |
| Age         | 1.09E-03  | 3.12E-04   | 3.483   | 0.000543 |
| Head_height | 5.83E-03  | 2.07E-03   | 2.819   | 0.005016 |
| Head_camera | 5.02E-03  | 8.80E-04   | 5.705   | 2.07E-08 |
| Front_limb  | -1.54E-03 | 8.10E-04   | -1.901  | 0.057951 |
| Hind_limb   | 2.12E-03  | 9.09E-04   | 2.335   | 0.019949 |
| Body        | 7.04E-03  | 1.47E-03   | 4.807   | 2.07E-06 |
| YOB         | 5.82E-06  | 4.86E-05   | 0.12    | 0.904755 |
| Sexg        | 1.96E-03  | 2.75E-03   | 0.714   | 0.475868 |
| Sexs        | 1.26E-02  | 2.34E-03   | 5.378   | 1.20E-07 |

### S1.20 PC3

#### Summary of fixed effects estimates

|             | Estimate  | Std. Error | t value | Pr(> t ) |
|-------------|-----------|------------|---------|----------|
| (Intercept) | -7.29E-01 | 5.43E-02   | -13.416 | < 2e-16  |
| Age         | -4.32E-04 | 1.74E-04   | -2.485  | 0.0133   |
| Head_height | -5.25E-03 | 1.15E-03   | -4.554  | 6.72E-06 |
| Head_camera | -2.60E-04 | 4.91E-04   | -0.529  | 5.97E-01 |
| Front_limb  | -3.91E-03 | 4.51E-04   | -8.667  | < 2e-16  |
| Hind_limb   | 3.60E-03  | 5.06E-04   | 7.1     | 4.68E-12 |
| Body        | 4.31E-03  | 8.16E-04   | 5.282   | 1.96E-07 |
| YOB         | 3.66E-04  | 2.71E-05   | 13.52   | < 2e-16  |
| Sexg        | 2.12E-03  | 1.53E-03   | 1.387   | 0.166    |
| Sexs        | -1.39E-03 | 1.31E-03   | -1.066  | 2.87E-01 |

### S1.21 PC4

#### Summary of fixed effects estimates

|             | Estimate  | Std. Error | t value | Pr(> t ) |
|-------------|-----------|------------|---------|----------|
| (Intercept) | -1.72E-02 | 6.15E-02   | -0.28   | 0.779741 |
| Age         | -1.78E-04 | 1.97E-04   | -0.904  | 0.366304 |
| Head_height | -5.41E-03 | 1.31E-03   | -4.141  | 4.10E-05 |
| Head_camera | 4.98E-04  | 5.56E-04   | 0.895   | 3.71E-01 |
| Front_limb  | 1.75E-03  | 5.11E-04   | 3.427   | 0.000663 |
| Hind_limb   | 2.74E-03  | 5.74E-04   | 4.777   | 2.39E-06 |
| Body        | -5.14E-03 | 9.24E-04   | -5.56   | 4.55E-08 |
| YOB         | 1.88E-05  | 3.07E-05   | 0.612   | 0.540574 |
| Sexg        | -2.48E-03 | 1.73E-03   | -1.43   | 0.153335 |
| Sexs        | -7.92E-03 | 1.48E-03   | -5.356  | 1.34E-07 |

## S1.22 PC5

### Summary of fixed effects estimates

|             | Estimate  | Std. Error | t value | Pr(> t ) |
|-------------|-----------|------------|---------|----------|
| (Intercept) | 6.56E-02  | 4.99E-02   | 1.314   | 0.189462 |
| Age         | 2.10E-04  | 1.60E-04   | 1.311   | 0.190484 |
| Head_height | 4.85E-04  | 1.06E-03   | 0.458   | 6.47E-01 |
| Head_camera | -7.28E-04 | 4.51E-04   | -1.617  | 1.07E-01 |
| Front_limb  | 1.02E-03  | 4.14E-04   | 2.462   | 0.014165 |
| Hind_limb   | 5.92E-03  | 4.65E-04   | 12.73   | < 2e-16  |
| Body        | 2.61E-03  | 7.50E-04   | 3.487   | 5.34E-04 |
| YOB         | -4.69E-05 | 2.49E-05   | -1.888  | 0.059658 |
| Sexg        | 1.01E-03  | 1.41E-03   | 0.721   | 0.471561 |
| Sexs        | 5.08E-03  | 1.20E-03   | 4.235   | 2.75E-05 |
