# Supplementary material for: Estimates of Genetic Parameters for Shape Space Data in Franches-Montagnes Horses
Source: MDPI journal article supplement (doi:10.3390/ani12172186), 2022-08-25
Supplement: s1 [file s1]

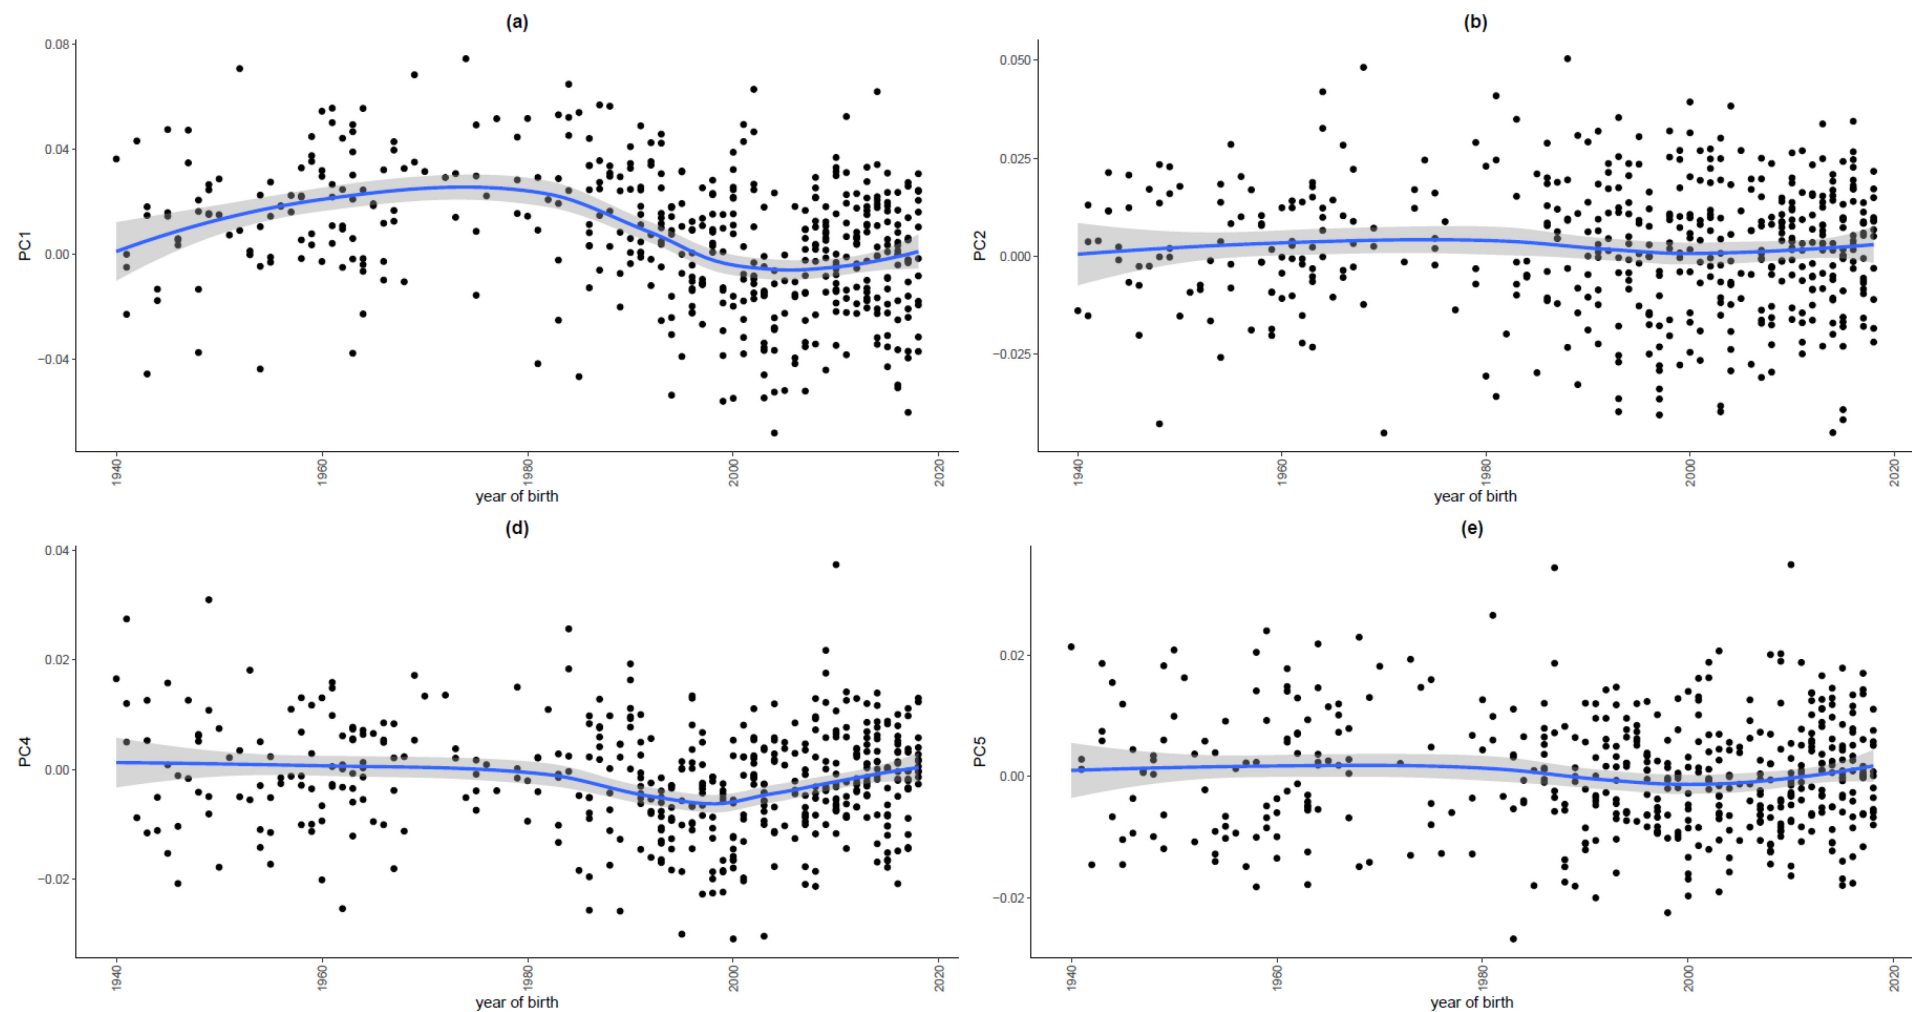

*Figure S5: Evolution of relative warp scores in Franches-Montagnes stallions born between 1940 and 2018: a) PC1, b) PC2, c) PC4, d) PC5, with the trend line (in blue, with the confidence interval in light grey) from local polynomial regression fitting.*
