# Supplementary material for: Estimates of Genetic Parameters for Shape Space Data in Franches-Montagnes Horses
Source: Animals (Basel). 2022 Aug 25;12(17):2186. doi: 10.3390/ani12172186 (PMC9454882; doi:10.3390/ani12172186)
Supplement: Supplementary file 1 [file animals-12-02186-s001.zip]

Archive with 6 entries (6 files):
- PDF/Figure S1.pdf
- PDF/Figure S2.pdf
- PDF/Figure S3.pdf
- PDF/Figure S4.pdf
- PDF/Figure S5.pdf
- PDF/File S1.pdf
