# Supplementary figures and images for: Estimates of Genetic Parameters for Shape Space Data in Franches-Montagnes Horses
Source: MDPI journal article supplement (doi:10.3390/ani12172186), 2022-08-25

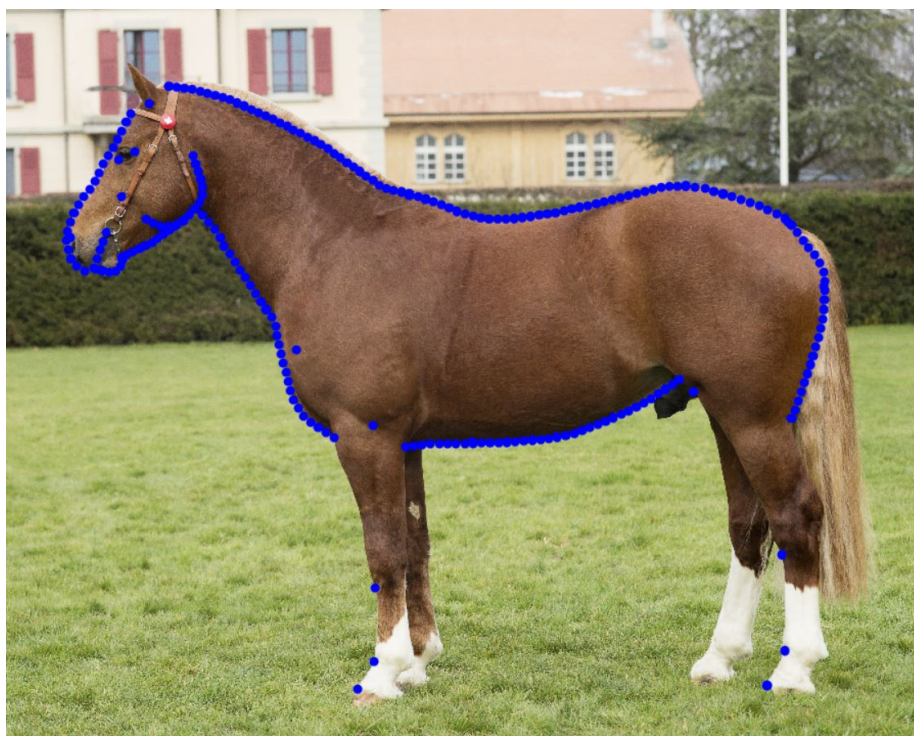

(a)

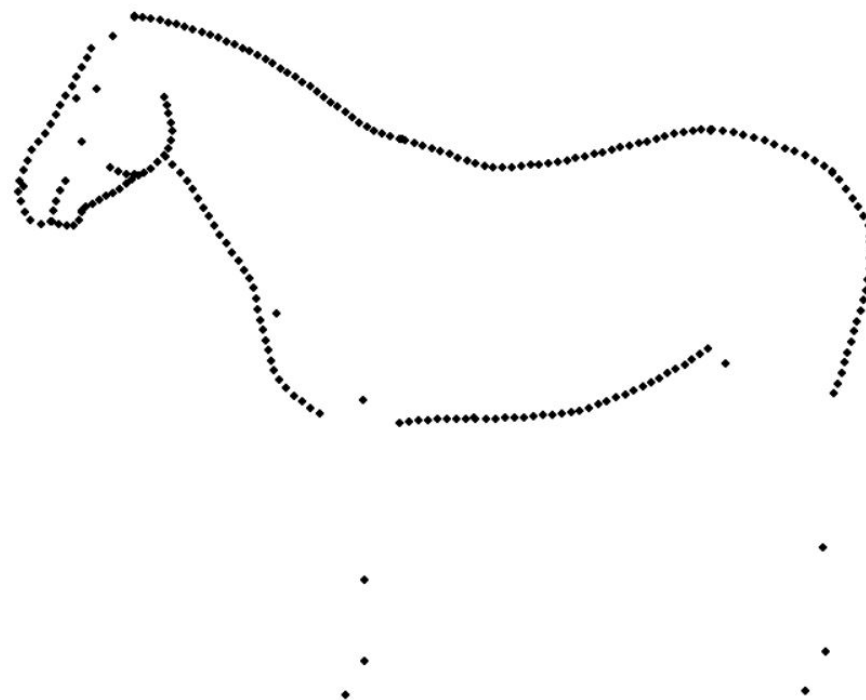

(b)

*Figure S1 : Horse shape space model with 246 landmarks on the photograph (a) and without background (b).*

Supplement: s1 [file s1]
